# Supplementary material for: A multi-dimensional, time-lapse, high content screening platform applied to schistosomiasis drug discovery
Source: PubMed Central journal article supplement (PMC7752906; doi:10.1038/s42003-020-01402-5), 2020-12-21
Supplement: 42003_2020_1402_MOESM2_ESM.pdf [file 42003_2020_1402_MOESM2_ESM.pdf]

## **Descriptions of Additional Supplementary File**

**Supplementary data:** Hit and non-hits arising from a screen of a 1,323-member drug set were compared with data from another drug screen that employed an observation-based scoring system (reference 29 in the main text).
